# Supplementary material
Source: ML conference proceedings conference paper supplement (https://openaccess.thecvf.com/content/cvpr_2016/html/Danelljan_Adaptive_Decontamination_of_2016_CVPR_paper.html)
Supplement: Supplementary file 1 [file Danelljan_Adaptive_Decontamination_of_2016_CVPR_supplemental.pdf]

# Supplementary Material

## Adaptive Decontamination of the Training Set: A Unified Formulation for Discriminative Visual Tracking

Martin Danelljan, Gustav Häger, Fahad Shahbaz Khan, Michael Felsberg  
Computer Vision Laboratory, Department of Electrical Engineering, Linköping University, Sweden  
{martin.danelljan, gustav.hager, fahad.khan, michael.felsberg}@liu.se

In this supplementary material of [3], we first prove the result  $\alpha_k \rightarrow \rho_k$  in the case when  $\mu \rightarrow 0$  (stated on page 4 in [3]). The derivation is performed in section 1. In section 2 we present the per-video and all attribute results on the OTB-2015 dataset [19]. Finally, section 3 contains per-video results on the Temple-Color dataset [14].

### 1. Derivation of $\alpha_k \rightarrow \rho_k$ When $\mu \rightarrow 0$

Here, we derive that the computed sample weights  $\alpha_k$  converge to the prior weights  $\rho_k$  when the flexibility parameter  $\mu$  is reduced in our joint formulation. That is, we derive that  $\alpha_k \rightarrow \rho_k$  when  $\mu \rightarrow 0$  for fixed model parameters  $\theta \in \Omega$ . Our joint optimization problem is given by (corresponds to eq. (3) in the paper),

$$\text{minimize} \quad J(\theta, \alpha) = \sum_{k=1}^t \alpha_k \sum_{j=1}^{n_k} L(\theta; x_{jk}, y_{jk}) + \frac{1}{\mu} \sum_{k=1}^t \frac{\alpha_k^2}{\rho_k} + \lambda R(\theta) \quad (1a)$$

$$\text{subject to} \quad \alpha_k \geq 0, \quad k = 1, \dots, t \quad (1b)$$

$$\sum_{k=1}^t \alpha_k = 1. \quad (1c)$$

Here, the prior weights are positive  $\rho_k > 0$  and sum up to one,

$$\sum_{k=1}^t \rho_k = 1 \quad (2)$$

We let the model parameters  $\theta$  be fixed and define the total loss in frame  $k$  by,

$$L_k = \sum_{j=1}^{n_k} L(\theta; x_{jk}, y_{jk}). \quad (3)$$

Minimizing the joint formulation (1) with respect to the weights  $\alpha_k$  is then equivalent to solving the following quadratic programming problem,

$$\text{minimize} \quad J_2(\alpha) = \sum_{k=1}^t L_k \alpha_k + \frac{1}{\mu} \sum_{k=1}^t \frac{\alpha_k^2}{\rho_k} \quad (4a)$$

$$\text{subject to} \quad \alpha_k \geq 0, \quad k = 1, \dots, t \quad (4b)$$

$$\sum_{k=1}^t \alpha_k = 1. \quad (4c)$$

We temporarily ignore the inequality constraint (4b) and introduce Lagrange multipliers for the constraint (4c),

$$\mathcal{L}(\alpha, \eta) = \sum_{k=1}^t L_k \alpha_k + \frac{1}{\mu} \sum_{k=1}^t \frac{\alpha_k^2}{\rho_k} - \eta \cdot \left( \sum_{k=1}^t \alpha_k - 1 \right). \quad (5)$$

Here,  $\eta$  denotes the Lagrange multiplier. Differentiation w.r.t.  $\alpha_k$  gives,

$$\frac{\partial \mathcal{L}}{\partial \alpha_k} = L_k + \frac{2}{\mu} \frac{\alpha_k}{\rho_k} - \eta, \quad k = 1, \dots, t. \quad (6)$$

The stationary point is computed by setting the partial derivatives to zero,

$$\begin{aligned} \frac{\partial \mathcal{L}}{\partial \alpha_k} = 0 &\iff \\ \alpha_k &= \frac{\mu \eta}{2} \rho_k - \frac{\mu}{2} L_k \rho_k, \quad k = 1, \dots, t \end{aligned} \quad (7)$$

The Lagrange multiplier  $\eta$  is computed by summing both sides of (7) over  $k$  and using (4c) and (2),

$$\begin{aligned} \sum_{k=1}^t \alpha_k &= \sum_{k=1}^t \left( \frac{\mu \eta}{2} \rho_k - \frac{\mu}{2} L_k \rho_k \right) \iff \\ 1 &= \frac{\mu \eta}{2} - \frac{\mu}{2} \sum_{k=1}^t L_k \rho_k \iff \\ \eta &= \frac{2}{\mu} + \sum_{k=1}^t L_k \rho_k. \end{aligned} \quad (8)$$

Using the result (8) in (7) gives,

$$\alpha_k = \rho_k + \frac{\mu}{2} \cdot \left( \rho_k \sum_{l=1}^t L_l \rho_l - L_k \rho_k \right) \quad (9)$$

From (9) it follows that  $\alpha_k \rightarrow \rho_k$  when  $\mu \rightarrow 0$ . To show that the inequality constraint (4b) also holds in the limit  $\mu \rightarrow 0$ , we define the constant

$$\delta = \min_k \rho_k \cdot \left| \rho_k \sum_{l=1}^t L_l \rho_l - L_k \rho_k \right|^{-1}. \quad (10)$$

This choice ensures that  $\alpha_k > 0, \forall k$  for  $0 < \mu < \delta$ . The inequality constraint (4b) is thus satisfied for  $0 < \mu < \delta$ . This proves that the limit  $\mu \rightarrow 0$  of (9) is also the limit of the solution  $\alpha_k$  of (4). Hence,  $\alpha_k \rightarrow \rho_k$  in (4) when  $\mu \rightarrow 0$ .

## 2. Detailed Results on OTB-2015

We provide detailed results on OTB-2015 [19] with 100 videos. The videos and ground truth are available at <https://sites.google.com/site/benchmarkpami/>. Figure 1 contains the success plots for all 11 attributes. Table 2 shows the per-video overlap precision for all trackers.

## 3. Detailed Results on Temple-Color

We also report detailed results on the Temple-Color dataset [14] with 128 videos. The videos and ground truth are available at <http://www.dabi.temple.edu/~hbling/data/TColor-128/TColor-128.html>. The per-video overlap precision for all trackers in our comparison are reported in table 2.

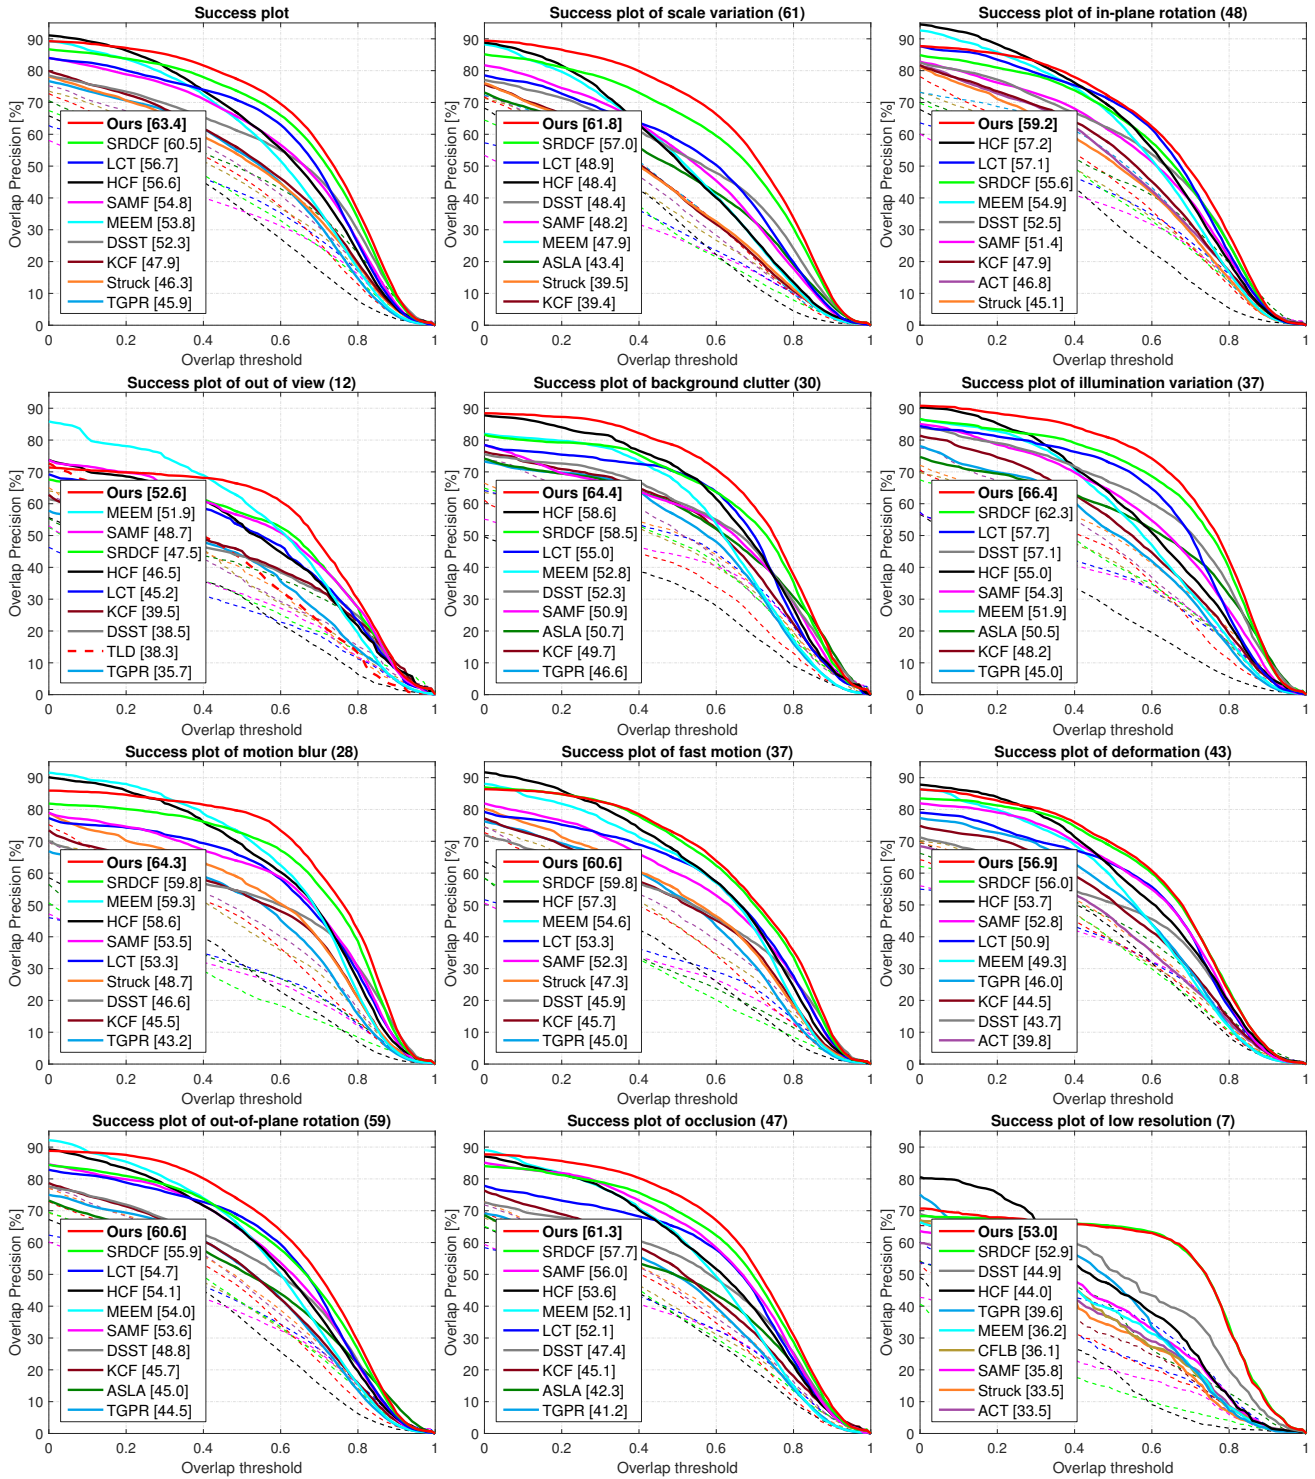

Figure 1. Success plots on OTB-2015 [19]. We show the total success plot (top-left) and the success plots for all 11 attributes. The title of each attribute plot contain the name of the attribute and the number of videos associated with it. The area-under-the-curve score is shown in the legend. For clarity, only the top 10 trackers in each plot are displayed in the legend. Our approach obtains the best results on all 11 attributes.

| Video      | EDFT[5]     | LSHT[9]     | DFT[18]     | ASLA[11]    | TLD[12]     | Struck[8]   | CFLB[6]     | ACT[4]      | TGPR[7]     | KCF[10]     | DSST[1]     | SAMF[13]    | DAI[17]     | MEEM[20]    | LCT[16]     | HCF[15]     | SRDCF[2]    | Ours        |
|------------|-------------|-------------|-------------|-------------|-------------|-------------|-------------|-------------|-------------|-------------|-------------|-------------|-------------|-------------|-------------|-------------|-------------|-------------|
| Basketball | 31          | 4.55        | 71.6        | 65.2        | 31.3        | 11          | 9.1         | 48.7        | 91.3        | 89.8        | 69.8        | 96.7        | 89.5        | 83          | 99.2        | <b>99.9</b> | 41.2        | 30.1        |
| Biker      | 26.7        | 8.89        | 26.7        | 46.7        | 32.6        | 26.7        | 48.1        | 26.7        | <b>87.4</b> | 26.7        | 28.1        | 31.9        | 44.4        | 26.7        | 45.9        | 25.9        | <b>48.9</b> | 46.7        |
| Bird1      | 26.7        | 4.41        | 26.2        | 2.45        | 0.49        | 15.4        | 0.98        | 2.45        | <b>31.1</b> | 6.37        | 6.62        | 5.64        | <i>30.1</i> | 4.41        | <b>31.1</b> | 19.9        | 6.37        | 5.64        |
| Bird2      | 94.9        | 85.9        | 71.7        | 50.5        | 42.4        | 52.5        | 47.5        | <b>99</b>   | 85.9        | 46.5        | 47.5        | <b>98</b>   | <b>99</b>   | <b>99</b>   | 77.8        | <b>99</b>   | 54.5        | 54.5        |
| BlurBody   | 11.7        | 26          | 11.4        | 15          | 44          | 98.8        | 41.3        | 53.9        | 98.5        | 58.7        | 62.3        | 95.8        | 37.1        | 98.8        | <b>99.4</b> | 99.1        | <b>100</b>  | <b>100</b>  |
| BlurCar1   | 1.48        | 1.21        | 7.68        | 2.29        | 13.6        | <b>99.9</b> | 50.4        | 69.9        | 94.5        | <b>100</b>  | 98.8        | <b>100</b>  | 1.48        | <b>100</b>  | <b>100</b>  | 99.7        | <b>99.9</b> | <b>99.9</b> |
| BlurCar2   | 7.35        | 21.9        | 17.4        | 12.3        | 84.8        | 93.8        | 94.7        | 94.7        | 93.8        | <b>94.7</b> | <b>100</b>  | <b>99.8</b> | 48.7        | <b>100</b>  | <b>100</b>  | 94.7        | <b>100</b>  | <b>100</b>  |
| BlurCar3   | 5.6         | 30.8        | 11.8        | 12          | 93.6        | <b>100</b>  | 56          | 32.8        | 93.3        | <b>99.4</b> | <b>100</b>  | <b>100</b>  | 25.2        | <b>100</b>  | <b>100</b>  | <b>100</b>  | <b>100</b>  | <b>100</b>  |
| BlurCar4   | 96.8        | 33.7        | <b>100</b>  | 21.8        | 42.6        | <b>100</b>  | <b>100</b>  | <b>100</b>  | <b>99.7</b> | <b>100</b>  |
| BlurFace   | 24.1        | 11.8        | 29          | 15          | <b>100</b>  | 44          | 31.4        | <b>100</b>  | <b>99.8</b> | <b>100</b>  | <b>100</b>  | <b>100</b>  | 26          | <b>100</b>  | <b>100</b>  | <b>100</b>  | <b>100</b>  | <b>100</b>  |
| BlurOwl    | 4.28        | 9.83        | 10.8        | 11.4        | 63.9        | 98.6        | 94.1        | 20.8        | 13.6        | 22.8        | 22          | 23.1        | <b>99.8</b> | <b>99</b>   | 89.4        | 96.5        | 98.6        | 97.1        |
| Board      | 19.4        | 86.5        | 19.9        | 50.9        | 14.1        | 79.9        | 68.1        | 73.7        | 11.3        | 85.5        | 84.2        | <b>97.1</b> | 2.01        | 82.5        | 85.4        | 94.7        | 85.7        | <b>95.7</b> |
| Bolt       | 1.71        | 32.6        | 4           | 1.43        | 17.7        | 2.29        | 2.29        | <b>100</b>  | 1.43        | 94.3        | <b>100</b>  | <b>99.7</b> | 96          | 88          | 98.9        | 98          | 1.43        | 1.43        |
| Bolt2      | 0.683       | 52.9        | 0.683       | 0.683       | 0.683       | 4.44        | 34.5        | 27          | 0.683       | 0.683       | 1.02        | 0.683       | <i>63.5</i> | 0.683       | 0.683       | <b>88.4</b> | 1.02        | 1.02        |
| Box        | 16.4        | 33.7        | 30.9        | 57.2        | 61.6        | 58.7        | 32.5        | 33.6        | 35.8        | 35.7        | 39.6        | <b>92.9</b> | 5.86        | 83.5        | 8.96        | 33.7        | 41.5        | <b>96</b>   |
| Boy        | 98          | 50.7        | 48.3        | 43.5        | 82.9        | 97.5        | 98.5        | 95          | 99          | 99.2        | <b>100</b>  | <b>100</b>  | 96.3        | 99.2        | <b>100</b>  | 99          | <b>100</b>  | <b>99.7</b> |
| Car1       | 5.39        | 5.39        | 5.39        | <b>81.6</b> | 38.7        | 5.39        | 6.27        | 5.39        | 7.75        | 5.39        | 60.5        | 36.3        | 5.39        | 5.39        | 20.8        | 5.39        | <b>100</b>  | <b>100</b>  |
| Car2       | <b>100</b>  | 98.2        | 13.4        | <b>100</b>  | <b>100</b>  | <b>100</b>  | <b>99.7</b> | <b>100</b>  | 9.2         | <b>100</b>  | <b>100</b>  | <b>100</b>  | 7.34        | <b>100</b>  | <b>100</b>  | <b>100</b>  | <b>100</b>  | <b>100</b>  |
| Car24      | 17.3        | 17.2        | 7.19        | <b>100</b>  | <b>99</b>   | 17          | 17.3        | 17.3        | 18.3        | 17.3        | 17.3        | 15.7        | 16.4        | 17.2        | 85.3        | 17.3        | <b>100</b>  | <b>100</b>  |
| Car4       | 27.5        | 27.6        | 25.8        | <b>100</b>  | 24          | 39.9        | 25          | 27.6        | 40.7        | 36.4        | <b>100</b>  | <b>100</b>  | 0.152       | 26.4        | <b>98.9</b> | 39.6        | <b>100</b>  | <b>100</b>  |
| CarDark    | 68.4        | 60.6        | 33.6        | <b>100</b>  | 53.7        | <b>100</b>  | 97.7        | <b>100</b>  | <b>100</b>  | 69.2        | <b>100</b>  | 58.3        | 2.04        | <b>100</b>  | <b>99.2</b> | 88.3        | <b>100</b>  | <b>100</b>  |
| CarScale   | 44.8        | 44.8        | 44.8        | 71          | 68.7        | 43.3        | 44.8        | 44.8        | 40.5        | 44.4        | <b>84.5</b> | 59.9        | 44.4        | 44.8        | 79          | 44.4        | 84.1        | <b>85.3</b> |
| ClifBar    | 29.7        | 28.2        | 23.9        | 37.7        | 42.2        | 21.6        | 25.6        | 31.8        | 9.32        | 30.1        | <b>88.6</b> | 25.6        | 29.4        | 60.6        | 70.3        | 41.7        | 44.1        | <b>85</b>   |
| Coke       | 14.4        | 49.8        | 8.59        | 14.4        | 57.4        | <b>94.2</b> | 70.4        | 64.3        | 88          | 72.2        | 83.2        | 79.7        | 47.8        | <b>95.5</b> | 91.4        | 91.4        | 63.6        | 65.6        |
| Couple     | 21.4        | 9.29        | 8.57        | 22.1        | 22.9        | 60.7        | 63.6        | 10.7        | 58.6        | 24.3        | 10.7        | 45.7        | 63.6        | 75.7        | 52.9        | 74.3        | <b>82.1</b> | <b>92.9</b> |
| Coupon     | <b>100</b>  | <b>100</b>  | <b>100</b>  | <b>100</b>  | 38.8        | <b>100</b>  | <b>100</b>  | <b>100</b>  | 37.9        | <b>100</b>  | <b>100</b>  | <b>100</b>  | <b>99.1</b> | 39.4        | <b>100</b>  | <b>100</b>  | <b>100</b>  | <b>100</b>  |
| Crossing   | 75          | 40          | 64.2        | <b>100</b>  | 45.8        | 95.8        | <b>98.3</b> | 88.3        | <b>98.3</b> | 95          | <b>100</b>  | <b>100</b>  | <b>97.5</b> | <b>98.3</b> | <b>100</b>  | 95          | <b>100</b>  | <b>100</b>  |
| Crowds     | 91          | 54.3        | 91          | 89          | 89          | 68.2        | 90.8        | 96.8        | <b>86.7</b> | <b>100</b>  | 90.2        | <b>99.7</b> | 1.73        | 83.8        | 96.2        | 99.4        | 95.1        | 89.6        |
| Dancer     | 89.3        | 88.4        | 89.8        | <b>100</b>  | 88.9        | 85.8        | 89.3        | 90.7        | <b>91.6</b> | <b>91.6</b> | <b>100</b>  | <b>100</b>  | 73.8        | 80.9        | <b>100</b>  | <b>91.6</b> | <b>100</b>  | <b>100</b>  |
| Dancer2    | <b>100</b>  | <b>100</b>  | <b>100</b>  | <b>100</b>  | 84          | <b>100</b>  | <b>98.7</b> | <b>98.7</b> | <b>100</b>  | <b>100</b>  | <b>100</b>  | <b>100</b>  |
| David      | 55.4        | 28.2        | 23.4        | 94.9        | 61.1        | 23.6        | 23.8        | 62.6        | 80.5        | 62.2        | <b>100</b>  | 95.8        | 39.1        | 62.6        | 92.8        | 60.1        | <b>98.9</b> | 97.5        |
| David2     | <b>100</b>  | <b>100</b>  | 54.2        | 83.6        | <b>100</b>  | 11          | <b>100</b>  | <b>100</b>  | <b>100</b>  | <b>92.2</b> | <b>100</b>  | <b>100</b>  |
| David3     | 87.3        | 74.6        | 74.2        | 49.6        | 32.1        | 33.7        | 53.6        | 87.7        | 98.8        | <b>99.2</b> | 52.8        | <b>100</b>  | <b>100</b>  | 94          | 98          | <b>100</b>  | <b>100</b>  | 96.4        |
| Deer       | 63.4        | 4.23        | 31          | 4.23        | 28.2        | <b>100</b>  | <b>100</b>  | <b>100</b>  | <b>100</b>  | 81.7        | 78.9        | <b>88.7</b> | 9.86        | <b>100</b>  | 81.7        | <b>100</b>  | <b>100</b>  | <b>100</b>  |
| Divng      | <b>18.6</b> | 16.7        | <b>18.6</b> | 17.7        | 16.7        | <i>18.1</i> | <b>18.6</b> | <b>18.6</b> | <i>18.1</i> | <b>18.6</b> | <i>18.1</i> | <b>18.6</b> | <b>18.6</b> | 17.2        | <b>18.6</b> | <b>18.6</b> | <b>18.6</b> | <i>18.1</i> |
| Dog        | 19.7        | 15          | 19.7        | <b>66.1</b> | <b>72.4</b> | 15.7        | 13.4        | 13.4        | 22.8        | 14.2        | 60.6        | 47.2        | 18.1        | 14.2        | 33.9        | 13.4        | 49.6        | 59.8        |
| Dog1       | 64.4        | 54.3        | 52.1        | <b>89.9</b> | 75.6        | 65.2        | 58.4        | 65.3        | 66.9        | 65.1        | <b>100</b>  | <b>72.8</b> | 6.52        | 62.9        | <b>100</b>  | 65.2        | <b>100</b>  | <b>100</b>  |
| Doll       | 49.3        | 23          | 35          | 92.2        | 69.3        | 68.9        | 72.4        | 49.6        | 86.4        | 55.2        | <b>99.7</b> | 65.2        | 18.3        | 72.9        | 99.4        | 72.9        | <b>99.7</b> | <b>99.7</b> |
| DragonBaby | 22.1        | 19.5        | 11.5        | 15.9        | 13.3        | 8.85        | 6.19        | 23          | 38.1        | 30.1        | 6.19        | 63.7        | 39.8        | <b>80.5</b> | 31          | 78.8        | 30.1        | 22.1        |
| Dudek      | 82.3        | 89.9        | 80.1        | 90.5        | 67          | 98.1        | 95.5        | 96.1        | 94.6        | 97.6        | 98.1        | 98.2        | 18.1        | 95.3        | <b>99.9</b> | 97.6        | <b>99.2</b> | 97.4        |
| FaceOcc1   | 67.2        | 79.4        | 80.3        | 27.2        | 56.4        | <b>100</b>  | <b>98.8</b> | <b>100</b>  | 96.2        | <b>100</b>  | <b>100</b>  | <b>100</b>  | 90.6        | <b>100</b>  | <b>100</b>  | 94.2        | <b>100</b>  | <b>100</b>  |
| FaceOcc2   | 99.4        | <b>99.8</b> | 99.5        | <b>100</b>  | 78.9        | <b>100</b>  | 97.8        | 62.4        | 93.5        | 96.6        | <b>100</b>  | 98.6        | 1.11        | 91.9        | <b>99.8</b> | <b>100</b>  | 93.6        | 90.4        |
| Fish       | <b>100</b>  | <b>100</b>  | <b>86.1</b> | <b>100</b>  | 62          | <b>100</b>  | 4.83        | 39.9        | <b>100</b>  | <b>100</b>  | <b>100</b>  | <b>100</b>  | 5.67        | 16.8        | <b>100</b>  | <b>100</b>  | <b>100</b>  | <b>100</b>  |
| FleetFace  | 54.7        | 65.5        | 55.6        | 64.5        | 44.1        | <i>78.1</i> | 57.3        | 58.7        | 64.2        | 66.9        | 66.5        | 70.3        | 5.23        | 77.8        | <b>94.3</b> | 61.8        | 66.3        | 67.8        |
| Football   | 97.5        | 77.3        | 84.3        | 77.1        | 74.9        | 89.8        | 68          | 63.8        | <b>98.3</b> | 70.2        | 79          | 78.5        | 0.276       | 95.6        | <b>100</b>  | <b>98.3</b> | 87.8        | 76.5        |
| Football1  | <b>100</b>  | 91.9        | <b>100</b>  | 43.2        | 36.5        | 32.4        | 32.4        | 40.5        | 68.9        | 94.6        | 39.2        | 35.1        | 79.7        | 90.5        | <b>97.3</b> | <b>100</b>  | 39.2        | 39.2        |
| Freeman1   | 12.6        | 18.4        | 17.8        | 32.8        | 23.3        | 20.2        | 14.7        | 13.8        | 22.7        | 16.3        | 35.3        | 28.2        | 19          | 22.1        | <b>65.3</b> | 29.8        | <b>62.6</b> | 53.1        |
| Freeman3   | 28.9        | 15.7        | 33          | <b>91.7</b> | 64.6        | 17.6        | 31.3        | 33          | 1.09        | 27.8        | 31.3        | 26.1        | 30.7        | 33          | 31.1        | 29.6        | 55.9        | <b>90.4</b> |
| Freeman4   | 17          | 20.1        | 18          | 17          | 21.6        | 18.7        | 15.9        | 17.3        | 19.1        | 18.4        | 41.7        | 16.6        | 23.7        | 28.3        | 41.3        | 45.9        | <b>87.6</b> | <b>90.5</b> |
| Girl       | 48.6        | 14.4        | 25.2        | 86.8        | 72.6        | 97          | 29          | 49.8        | 17.4        | 74.2        | 30.6        | <b>100</b>  | 46.2        | 90.4        | <b>97.6</b> | 97.4        | 77.6        | 79.8        |
| Girl2      | 7.13        | 8.13        | 7           | 15.5        | 27.6        | 35.9        | 7.27        | 7           | 7.27        | 7           | 7.27        | 77.5        | 55.4        | <b>78.6</b> | 7.47        | 7.47        | 7.4         | <b>87.8</b> |
| Gym        | 7.04        | 31.2        | 6.91        | 4.95        | 35.6        | 11.1        | 3.13        | 26.9        | 35.5        | 34.3        | 1.56        | 35.1        | 29.3        | 37.9        | 2.35        | 40.8        | <b>53.5</b> | <b>41.3</b> |
| Human2     | 9.31        | 16.8        | 9.13        | 93.2        | 48.8        | 71.5        | 54.4        | 17.6        | 19.5        | 18.3        | 55.8        | 56.9        | 29          | 83.4        | 94.5        | 80.4        | <b>97.8</b> | <b>99.7</b> |
| Human3     | 0.53        | 1.24        | 0.53        | 0.648       | 0.53        | 1.06        | 0.53        | 2.53        | 0.471       | 0.471       | 2.77        | 0.471       | 6.77        | <b>63.8</b> | 0.471       | 3.24        | 3.18        | <b>77.8</b> |
| Human4     | 19.3        | 19          | 19.3        | 15.5        | 13.6        | 21.1        | 19.5        | 19.2        | 59.4        | 51.3        | 90.4        | <b>93.6</b> | 60          | 49.5        | 79.3        | 60.9        | <b>100</b>  | 91          |
| Human5     | 34.2        | 5.05        | 7.57        | <b>98.9</b> | 60          | 33.9        | 34.2        | 24          | 28.5        | 23.6        | 24.3        | 24          | 1.4         | 34.2        | 8.27        | 24          | 96.5        | <b>99.9</b> |
| Human6     | 22.5        | 20.1        | 21.2        | 43.9        | 30.4        | 22.3        | 22.5        | 22.6        | 21.6        | 22.5        | 45.6        | 25          | 22.5        | 22.3        | 26.9        | 22.5        | <b>92.2</b> | <b>47.1</b> |
| Human7     | 23.2        | 26.4        | 16          | 29.2        | <b>94</b>   | 41.2        | 41.2        | 33.2        | 50.4        | 40.8        | 42.4        | 44.8        | 15.6        | 41.2        | 28.4        | 40.8        | <b>100</b>  | <b>100</b>  |
| Human8     | 13.3        | 7.81        | 13.3        | 8.59        | 9.38        | 13.3        | 4.69        | 25.8        | 11.7        | 30.5        | <b>100</b>  | 67.2        | 29.7        | 30.5        | <b>99.2</b> | 30.5        | <b>100</b>  | <b>100</b>  |
| Human9     | 14.8        | 23          | 13.4        | 18.7        | 20.3        | 4.92        | 22.6        | 19.7        | 19          | 23.9        | 23.9        | 19          | 16.7        | 19.7        | <b>47.2</b> | 23.9        | 46.2        | <b>46.6</b> |
| Ironman    | 4.22        | 2.41        | 3.61        | 15.1        | 8.43        | 4.82        | 7.23        | 24.7        | 8.43        | 15.1        | 13.3        | 11.4        | 4.82        | <b>57.8</b> | 9.64        | <b>60.8</b> | 3.01        | 4.22        |
| Jogging    | 22.1        | 91.2        | 21.5        | 22.8        | 96.4        | 95.8        | 17.3        | 22.5        | 22.5        | 22.5        | 22.5        | <b>96.7</b> | 22.5        | 91.5        | <b>96.7</b> | 96.4        | <b>97.1</b> | <b>97.1</b> |
| Jogging    | 15          | 15.6        | 15.6        | 18.2        | 95.4        | 16.3        | 97.7        | 18.2        | 99.3        | 16          | 18.2        | <b>99.7</b> | 19.5        | 86          | 97.1        | <b>100</b>  | 99.3        | 98.7        |
| Jump       | 5.74        | 4.92        | 5.74        | 7.38        | 4.1         | <b>9.84</b> | 8.2         | <b>9.02</b> | 8.2         | 7.38        | 8.2         | 8.2         | 3.28        | 8.2         | 6.56        | <b>9.84</b> | 2.46        | 2.46        |
| Jumping    | 91.7        | 7.67        | 11.8        | 5.75        | 92.3        | 88.5        | 4.79        | 4.79        | 10.2        | 28.1        | 6.07        | 24.6        |             |             |             |             |             |             |

| Video          | EDF[1]      | LSH[10]     | DFT[18]     | ASLA[11]    | TLDF[12]    | Struck[13]  | CFLB[14]    | ACT[15]     | TGPR[16]    | KCF[17]     | DSST[18]    | SAMF[19]    | DAT[20]     | MEEM[20]    | LCT[16]     | HCF[17]     | SRDCF[21]   | Ours        |             |
|----------------|-------------|-------------|-------------|-------------|-------------|-------------|-------------|-------------|-------------|-------------|-------------|-------------|-------------|-------------|-------------|-------------|-------------|-------------|-------------|
| Airport        | 38.5        | 28.4        | 40.5        | 44.6        | 43.9        | 41.9        | 1.35        | 40.5        | 42.6        | 42.6        | <b>47.3</b> | 43.2        | 42.6        | 41.2        | 42.6        | 42.6        | 42.6        | <b>85.1</b> | 45.3        |
| Baby           | 29.7        | 13.2        | 29.7        | 90.9        | 61.5        | 27.4        | 29.7        | 29.7        | 32.1        | 27.4        | 29.7        | 29.7        | 29.7        | 29.1        | 29.1        | 29.1        | 29.1        | 90.9        | 33.4        |
| Badminton      | 17.8        | 91.9        | 17.6        | 92.7        | 72.9        | 58          | 7.25        | 54.7        | <b>96.5</b> | <b>96.4</b> | 72.2        | 85.1        | 83.9        | 90.8        | 95.3        | 89.8        | 77.4        | 78.9        | 78.3        |
| Badminton      | 7.09        | 0.142       | 4.26        | 29.6        | 3.55        | 64          | 59.4        | 49.6        | 85.7        | 9.93        | 41.8        | <b>86</b>   | <b>86.4</b> | 68.5        | 80.6        | 82.7        | 65.2        | 78.3        | 78.3        |
| Ball           | 2.3         | 1.28        | 2.3         | 2.56        | 1.28        | 6.91        | 2.56        | 1.53        | 2.3         | 1.33        | 1.28        | 1.79        | 11.8        | 25.7        | 1.28        | 28.6        | 1.28        | 5.12        | 5.12        |
| Ball           | 6.04        | 0.864       | 13.1        | 20.2        | 10.4        | 0.173       | 32          | 40.4        | 36.1        | 6.04        | 44.2        | 67.2        | 57.2        | 54.1        | 67.2        | 57.2        | 54.1        | 91.5        | 91.5        |
| Ball           | 6.4         | 29.2        | 69.4        | 59          | <b>80.4</b> | 59          | 58          | 69.4        | 63.2        | 69.4        | 56.3        | 69.4        | 69.4        | 69.4        | 69.4        | 69.4        | 69.4        | 69.4        | 69.4        |
| Ball           | <b>5.02</b> | 1.49        | 4.83        | 0.372       | 0.372       | 2.97        | 2.42        | 0.372       | 4.65        | 1.3         | 2.23        | 1.3         | 4.65        | 4.65        | 3.35        | <b>5.39</b> | <b>5.02</b> | <b>5.02</b> | <b>5.02</b> |
| Basketball     | 31          | 87.9        | 71.6        | 16.7        | 33.8        | 49          | 8.97        | 48.7        | 88.7        | 89.8        | 12.1        | 96.7        | 89.5        | 83          | <b>99</b>   | <b>96.9</b> | 41.4        | 96.1        | 96.1        |
| Basketball     | 11.7        | 10.5        | 12.1        | 11.5        | 7.46        | 11.9        | 11.1        | 14.5        | 9.68        | 19          | 16.7        | 34.7        | 11.1        | 13.5        | 19.4        | 19.4        | 56.9        | <b>67.5</b> | <b>67.5</b> |
| Basketball     | 6.59        | 12.3        | 9.01        | 18.2        | 6.81        | 16.5        | 9.23        | 10.8        | 10.8        | 19.9        | 16.5        | 43          | 46.2        | 5.27        | 31          | 33.2        | 35.4        | 47.7        | 47.7        |
| Basketball     | 49.4        | 57.1        | 9.3         | 22          | 4.76        | 61          | 59.6        | 67.6        | 64.4        | 69.8        | 34.7        | 76.6        | 72.3        | <b>94.1</b> | 59          | 76.6        | 32.9        | 87.5        | 87.5        |
| Bee            | 75.8        | 78.9        | 14.4        | 38.9        | <b>98.9</b> | 83.3        | 37.8        | 43.3        | 91.1        | 20          | 26.7        | 22.2        | 93.6        | 54.4        | 28.9        | 28.9        | 43.3        | 57.8        | 57.8        |
| Bicycle        | 25.5        | 55.4        | 21          | <b>95.2</b> | 24.7        | 30.6        | 19.9        | 20.3        | 35.4        | 19.6        | 60.9        | 78.6        | 47.2        | 44.6        | 19.2        | 33.6        | <b>96.3</b> | <b>94.8</b> | <b>94.8</b> |
| Bike           | 71.4        | 4.12        | 39.5        | 97.1        | 12.9        | 75.9        | 11.5        | 74.7        | 9.7         | 76.7        | <b>99.6</b> | <b>100</b>  | 74.2        | 75.7        | 76.7        | 76.7        | <b>100</b>  | <b>100</b>  |             |
| Bike           | 2.34        | 2.34        | 2.34        | 13.4        | 15.8        | 2.34        | 2.34        | 2.46        | 2.34        | 13.5        | 10.8        | 2.34        | 2.34        | 2.34        | 2.34        | 9.08        | 2.34        | 9.08        | 9.08        |
| Biker          | 19          | 19          | 19          | 52          | 26.3        | 21.8        | 19          | 43          | 63.1        | 19          | 93.9        | 93.9        | 19          | 41.3        | 19          | 47.5        | <b>96.6</b> | <b>91.2</b> | <b>91.2</b> |
| Bikeslow       | 2.77        | 2.22        | 21.9        | 3.05        | 1.39        | 2.77        | 12.7        | 18.3        | 46.5        | 21.6        | 7.48        | 35.7        | <b>76.7</b> | 46          | 2.22        | 56.2        | 15          | 22.4        | 22.4        |
| Bird           | 94.9        | 16.2        | 94.9        | 9.09        | 43.4        | 49.5        | 47.5        | 99          | 57.6        | 54.5        | 52.5        | 55.6        | <b>99</b>   | <b>98</b>   | 76.8        | 98          | 57.6        | 65.7        | 65.7        |
| Board          | 19.2        | 83.1        | 20.1        | 13.7        | 5.35        | 81.9        | 95.8        | 83.9        | 10.9        | 92          | 81.6        | 82.4        | 95.9        | 89.3        | 92.3        | 92.8        | 92.1        | <b>98.8</b> | <b>98.8</b> |
| Boat           | 5.04        | 5.04        | 5.04        | 6.1         | 16.2        | 5.04        | 5.04        | 5.04        | 5.04        | 5.04        | 5.57        | 39.3        | 4.51        | 5.04        | 5.04        | 5.04        | <b>50.7</b> | <b>50.4</b> | <b>50.4</b> |
| Boat           | 4.4         | 39.8        | 44.9        | 60.4        | 42.5        | 52.9        | 51.2        | 53.6        | 45.4        | 44.9        | <b>66.5</b> | <b>69.4</b> | 27.2        | 51.2        | 44.4        | 52.4        | 58.3        | 59.5        | 59.5        |
| Bolt           | 1.71        | 1.14        | 4           | 1.43        | 17.7        | 1.43        | 2.29        | <b>100</b>  | 2.29        | 94.3        | <b>100</b>  | <b>99.7</b> | 96          | 88          | 98.6        | 98          | 1.43        | 1.43        | 1.43        |
| Boy            | 98          | 42.8        | 48.3        | 43.9        | 96.5        | 97.5        | 98.5        | 95          | 95          | <b>99.2</b> | <b>100</b>  | <b>100</b>  | 96.3        | 99.2        | 99          | 99          | <b>100</b>  | <b>100</b>  |             |
| Busstation     | 10.5        | 9.37        | 10.5        | 10.2        | 10.5        | <b>56.2</b> | 10.5        | 11          | 10.5        | 10.5        | 10.2        | 10.2        | 9.92        | 11.3        | 10.5        | 10.2        | <b>90.4</b> | <b>10.2</b> | <b>10.2</b> |
| Busstation     | 24.6        | 34.7        | 24.8        | 24.1        | 33.9        | 29.1        | 91.9        | 26.3        | 90.1        | 87.8        | 92.4        | 23.8        | 93.9        | <b>98.7</b> | 88.1        | 90.4        | <b>97.5</b> | <b>96.7</b> | <b>96.7</b> |
| CarDark        | 6.4         | 50.1        | 33.6        | <b>100</b>  | <b>27.5</b> | <b>100</b>  | <b>98.7</b> | <b>100</b>  | <b>100</b>  | <b>69.2</b> | <b>100</b>  | <b>69.2</b> | 58.3        | 2.04        | <b>100</b>  | <b>100</b>  | <b>100</b>  | <b>100</b>  | <b>100</b>  |
| CarScale       | 44.8        | 44.8        | 44.8        | 71.8        | 75.4        | 43.3        | 44.8        | 44.8        | 47.6        | 44.4        | <b>84.5</b> | 59.9        | 44.4        | 44.8        | 44.8        | 44.8        | 44.8        | <b>86.7</b> | <b>86.7</b> |
| CarSighting    | 28.1        | 28.1        | 28.1        | 28.7        | 28.7        | 28.7        | 28.7        | 28.1        | 28.1        | 28.1        | 28.1        | 28.1        | 28.1        | 28.1        | 28.1        | 28.1        | 28.1        | 28.7        | 28.7        |
| CarSighting    | <b>99.5</b> | <b>96</b>   | <b>100</b>  | <b>100</b>  | 72          | <b>98.8</b> | 100         | 97.7        | 91.6        | <b>99.5</b> | 96.5        | 84.8        | 98.3        | 98.6        | 96          | 99.1        | 99.1        | 99.1        | 99.1        |
| CarSighting    | 6.33        | 6.33        | 6.33        | 6.79        | <b>81.7</b> | 6.33        | 6.33        | 6.33        | 6.33        | 6.33        | <b>100</b>  | 7.69        | 6.33        | 6.33        | 6.33        | 6.33        | 6.33        | <b>100</b>  | <b>100</b>  |
| Charger        | 17.1        | 23.9        | 18.1        | 22.1        | 50.3        | 19.1        | 13.1        | 36.6        | 30.5        | 19.5        | <b>79.5</b> | 56.4        | 41.9        | 22.1        | 29.5        | 29.5        | <b>83.2</b> | <b>71.8</b> | <b>71.8</b> |
| Charger        | 42.4        | 47.2        | 45.9        | 14.4        | 47.7        | 49.5        | 63.2        | 64.3        | 91.8        | 72.3        | 93.8        | 79.7        | 47.8        | 95.4        | 91.4        | 91.4        | 61.5        | 58.4        | 58.4        |
| Coke           | 21.4        | 10.7        | 8.57        | 10.7        | 5           | 60.7        | 63.6        | 10.7        | 10.7        | 24.3        | 10.7        | 45.7        | 63.6        | 75.7        | 50          | 74.3        | <b>92.9</b> | <b>94.3</b> | <b>94.3</b> |
| Crossing       | 75          | 11.7        | 64.2        | <b>100</b>  | 45.8        | 95.8        | <b>98.3</b> | 88.3        | <b>98.3</b> | 95          | <b>100</b>  | <b>100</b>  | 97.5        | <b>98.3</b> | 96.7        | 95          | <b>100</b>  | <b>100</b>  | <b>100</b>  |
| Cup            | <b>100</b>  | <b>100</b>  | <b>100</b>  | <b>100</b>  | <b>100</b>  | <b>100</b>  | <b>46.2</b> | <b>100</b>  |
| Cup            | 1.48        | 1.18        | 1.18        | 1.18        | 2.66        | 1.18        | 1.18        | 1.18        | 1.18        | 1.18        | 1.18        | 1.18        | 1.18        | 1.18        | 1.18        | 1.18        | 1.18        | 1.48        | 1.48        |
| David          | 55.4        | 43.7        | 23.4        | 95.3        | 91.3        | 21.8        | 23.8        | 62.6        | 62.6        | 62.6        | <b>100</b>  | 95.8        | 91.1        | 62.6        | 68.9        | 68.9        | 98.9        | 98.9        | 98.9        |
| David3         | 67.3        | 35.3        | 74.2        | 52.4        | 32.1        | 33.7        | 64.7        | 87.7        | <b>99.6</b> | 99.2        | 53.6        | <b>100</b>  | <b>100</b>  | 94          | 96.4        | 100         | <b>99.6</b> | <b>99.6</b> |             |
| Deer           | 83.4        | 4.23        | 31          | 4.23        | 78.9        | <b>100</b>  | <b>100</b>  | <b>100</b>  | <b>100</b>  | 81.7        | 84.5        | <b>88.7</b> | 9.86        | <b>100</b>  | 81.7        | <b>100</b>  | <b>100</b>  | <b>100</b>  | <b>100</b>  |
| Diving         | 19          | 18.2        | 21.2        | 29.4        | 16.5        | 21.2        | 29          | 20.8        | 14.3        | <b>30.3</b> | 28.1        | 17.7        | 29.4        | 18.2        | 30.3        | 28.6        | 22.1        | 22.1        | 22.1        |
| Doll           | 40.3        | 35          | 49.7        | 35          | 49.7        | 69          | 52.7        | 73.5        | 73.5        | 99.6        | 99.6        | 99.6        | 99.6        | 99.6        | 99.6        | 99.6        | 99.6        | 99.6        | 99.6        |
| Dog            | 20.5        | 11.6        | 33          | 38.4        | 36.6        | 28.6        | 33          | 35.7        | 45.5        | 2.68        | 2.68        | 18.8        | <b>85.7</b> | <b>26.8</b> | <b>74.7</b> | 29.5        | 16.1        | 16.1        | 16.1        |
| Electricalbike | 97.8        | 1.47        | 59.5        | <b>100</b>  | 93.4        | 97.1        | 97.1        | 97.8        | 99.6        | 97.1        | <b>99.9</b> | <b>99.9</b> | 1.83        | 96.7        | 96.8        | 94.5        | 99.5        | <b>100</b>  | <b>100</b>  |
| FaceDec1       | 67.2        | <b>100</b>  | 80.3        | 29          | 51.1        | <b>100</b>  | <b>98.8</b> | <b>100</b>  | <b>98</b>   | <b>100</b>  | <b>100</b>  | <b>100</b>  | <b>100</b>  | 90.6        | <b>100</b>  | <b>100</b>  | <b>100</b>  | <b>100</b>  | <b>100</b>  |
| Face           | 3.71        | 3.55        | 3.71        | 4.35        | 43.9        | 3.06        | 3.06        | 3.97        | 3.71        | 4.35        | 4.35        | 4.35        | 3.23        | 3.55        | 3.71        | 3.71        | 4.35        | <b>80</b>   | <b>80</b>   |
| Face           | 20.1        | 22.5        | 28.8        | 8.28        | 20.2        | 20.2        | 20.2        | 8.78        | 10.1        | 52.7        | <b>89.9</b> | 10.1        | 73.7        | 82.7        | 82.7        | 82.7        | 82.7        | <b>92.9</b> | <b>92.9</b> |
| Fish           | 4.99        | 5.49        | 5.24        | 5.24        | 6.73        | 29.7        | 2.74        | 6.98        | <b>65.7</b> | 4.24        | 4.99        | 32.7        | <b>65.6</b> | 58.9        | 59.9        | 61.1        | 17.7        | 11.5        | 11.5        |
| Fish           | 15.2        | 15.2        | 34.2        | 15          | 19.4        | 14.1        | 14.8        | 15.2        | 14          | 14.8        | 15.2        | 15          | 15.4        | <b>72.5</b> | <b>57.4</b> | 15.4        | 15.4        | 41          | 41          |
| Football       | <b>100</b>  | <b>85.1</b> | <b>100</b>  | 47.3        | 35.1        | 32.4        | 32.4        | 40.5        | 94.6        | 94.6        | 39.2        | 35.1        | 79.7        | 90.5        | <b>97.5</b> | <b>100</b>  | 29.2        | 52.7        | 52.7        |
| Golf           | <b>100</b>  | 85.2        | 29.4        | 80.2        | 90.8        | 34.6        | 90.8        | 83.6        | 90.8        | 83.6        | 90.8        | 83.6        | 83.6        | 90.8        | 83.6        | 90.8        | 83.6        | 90.8        | 90.8        |
| Girlnov        | 6.2         | 28.9        | 5.67        | 41.2        | 21.1        | 17.3        | 7.2         | 5.93        | 6.33        | 7.4         | 6.93        | 45.2        | <b>83.7</b> | <b>85.3</b> | 7.4         | 7.4         | 7.4         | 7.27        | 7.27        |
| Guitar         | 95.9        | 88.1        | 91.4        | 90.3        | 97          | 97.4        | 96.6        | 97.8        | 98.3        | 97.4        | 97.4        | 17.2        | 94.4        | 97.8        | 96.3        | <b>98.9</b> | <b>98.9</b> | <b>98.9</b> | <b>98.9</b> |
| Guitar         | 94.9        | <b>98.1</b> | <b>98.1</b> | 51.4        | 17.3        | 68.1        | 79.9        | <b>98.1</b> | 63.9        | 91.1        | 54.6        | <b>98.1</b> | 80.5        | 96.5        | 90.4        | 92.3        | 64.9        | 65.2        | 65.2        |
| Gym            | 11          | 54.8        | 17.9        | 43.9        | 42.8        | 38.3        | 17.6        | 19.2        | 80.7        | 14.4        | <b>88.2</b> | <b>88.4</b> | 88.9        | 77.8        | 80.7        | 80.7        | 44.9        | 69.6        | 69.6        |
| Hand           | <b>99.7</b> | 59          | 60.2        | 16.4        | 15.3        | 26.6        | 14.3        | 16.8        | 33.4        | 15.1        | 16.8        | 16.8        | 59          | 16.8        | 33.4        | 15.6        | 18.8        | 18.9        | 18.9        |
| Hand           | 86.3        | 30.7        | 93.3        | 2.34        | 8.73        | 4.74        | 1.25        | 2.24        | 97          | 92.8        | 13.5        | 97          | 99.3        | 98          | 97.8        | 94.3        | <b>99.3</b> | <b>99.3</b> | <b>99.3</b> |
| Hand</         |             |             |             |             |             |             |             |             |             |             |             |             |             |             |             |             |             |             |             |

## References

- [1] M. Danelljan, G. Häger, F. Shahbaz Khan, and M. Felsberg. Accurate scale estimation for robust visual tracking. In *BMVC*, 2014. 4, 5
- [2] M. Danelljan, G. Häger, F. Shahbaz Khan, and M. Felsberg. Learning spatially regularized correlation filters for visual tracking. In *ICCV*, 2015. 4, 5
- [3] M. Danelljan, G. Häger, F. Shahbaz Khan, and M. Felsberg. Adaptive decontamination of the training set: A unified formulation for discriminative visual tracking. In *CVPR*, 2016. 1
- [4] M. Danelljan, F. Shahbaz Khan, M. Felsberg, and J. van de Weijer. Adaptive color attributes for real-time visual tracking. In *CVPR*, 2014. 4, 5
- [5] M. Felsberg. Enhanced distribution field tracking using channel representations. In *ICCV Workshop*, 2013. 4, 5
- [6] H. K. Galoogahi, T. Sim, and S. Lucey. Correlation filters with limited boundaries. In *CVPR*, 2015. 4, 5
- [7] J. Gao, H. Ling, W. Hu, and J. Xing. Transfer learning based visual tracking with gaussian process regression. In *ECCV*, 2014. 4, 5
- [8] S. Hare, A. Saffari, and P. Torr. Struck: Structured output tracking with kernels. In *ICCV*, 2011. 4, 5
- [9] S. He, Q. Yang, R. Lau, J. Wang, and M.-H. Yang. Visual tracking via locality sensitive histograms. In *CVPR*, 2013. 4, 5
- [10] J. F. Henriques, R. Caseiro, P. Martins, and J. Batista. High-speed tracking with kernelized correlation filters. *PAMI*, 2015. 4, 5
- [11] X. Jia, H. Lu, and M.-H. Yang. Visual tracking via adaptive structural local sparse appearance model. In *CVPR*, 2012. 4, 5
- [12] Z. Kalal, J. Matas, and K. Mikolajczyk. P-n learning: Bootstrapping binary classifiers by structural constraints. In *CVPR*, 2010. 4, 5
- [13] Y. Li and J. Zhu. A scale adaptive kernel correlation filter tracker with feature integration. In *ECCV Workshop*, 2014. 4, 5
- [14] P. Liang, E. Blasch, and H. Ling. Object tracking benchmark. *TIP*, 2015. 1, 2, 5
- [15] C. Ma, J.-B. Huang, X. Yang, and M.-H. Yang. Hierarchical convolutional features for visual tracking. In *ICCV*, 2015. 4, 5
- [16] C. Ma, X. Yang, C. Zhang, and M. Yang. Long-term correlation tracking. In *CVPR*, 2015. 4, 5
- [17] H. Possegger, T. Mauthner, and H. Bischof. In defense of color-based model-free tracking. In *CVPR*, 2015. 4, 5
- [18] L. Sevilla-Lara and E. G. Learned-Miller. Distribution fields for tracking. In *CVPR*, 2012. 4, 5
- [19] Y. Wu, J. Lim, and M.-H. Yang. Object tracking benchmark. *PAMI*, 2015. 1, 2, 3, 4
- [20] J. Zhang, S. Ma, and S. Sclaroff. MEEM: robust tracking via multiple experts using entropy minimization. In *ECCV*, 2014. 4, 5
